# Supplementary material for: Organometallic Platinum(II) Photosensitisers that Demonstrate Ligand‐Modulated Triplet‐Triplet Annihilation Energy Upconversion Efficiencies
Source: PubMed Central journal article supplement — Chemistry. 2022 Dec 23;29(9):e202203241. doi: 10.1002/chem.202203241 (PMC10107691; doi:10.1002/chem.202203241), 2022-12-23
Supplement: CHEM-29-0-s001.pdf [file CHEM-29-0-s001.pdf]

# Chemistry–A European Journal

Supporting Information

## **Organometallic Platinum(II) Photosensitisers that Demonstrate Ligand-Modulated Triplet-Triplet Annihilation Energy Upconversion Efficiencies**

Sophie A. Fitzgerald, Xiao Xiao, Jianzhang Zhao,\* Peter N. Horton, Simon J. Coles,  
Richard C. Knighton, Benjamin D. Ward, and Simon J. A. Pope\*

|                      |           |
|----------------------|-----------|
| <b>Figure S1-2</b>   | <b>2</b>  |
| <b>Figure S3-4</b>   | <b>3</b>  |
| <b>Figure S5-6</b>   | <b>4</b>  |
| <b>Figure S7-9</b>   | <b>5</b>  |
| <b>Figure S10-11</b> | <b>6</b>  |
| <b>Figure S12-13</b> | <b>7</b>  |
| <b>Figure S14-15</b> | <b>8</b>  |
| <b>Figure S16-17</b> | <b>9</b>  |
| <b>Figure S18-19</b> | <b>10</b> |
| <b>Figure S20-21</b> | <b>11</b> |
| <b>Figure S22-23</b> | <b>12</b> |
| <b>Figure S24-25</b> | <b>13</b> |
| <b>Figure S26</b>    | <b>14</b> |
| <b>Figure S27-28</b> | <b>17</b> |
| <b>Figure S29</b>    | <b>18</b> |
| <b>Figure S30-31</b> | <b>19</b> |
| <b>Figure S32-33</b> | <b>20</b> |
| <b>Figure S34-35</b> | <b>21</b> |
| <b>Figure S36</b>    | <b>22</b> |
| <b>Figure S37</b>    | <b>23</b> |
| <b>Figure S38-39</b> | <b>25</b> |
| <b>Table S1</b>      | <b>15</b> |
| <b>Table S2</b>      | <b>16</b> |
| <b>Table S3</b>      | <b>16</b> |
| <b>Table S4</b>      | <b>24</b> |

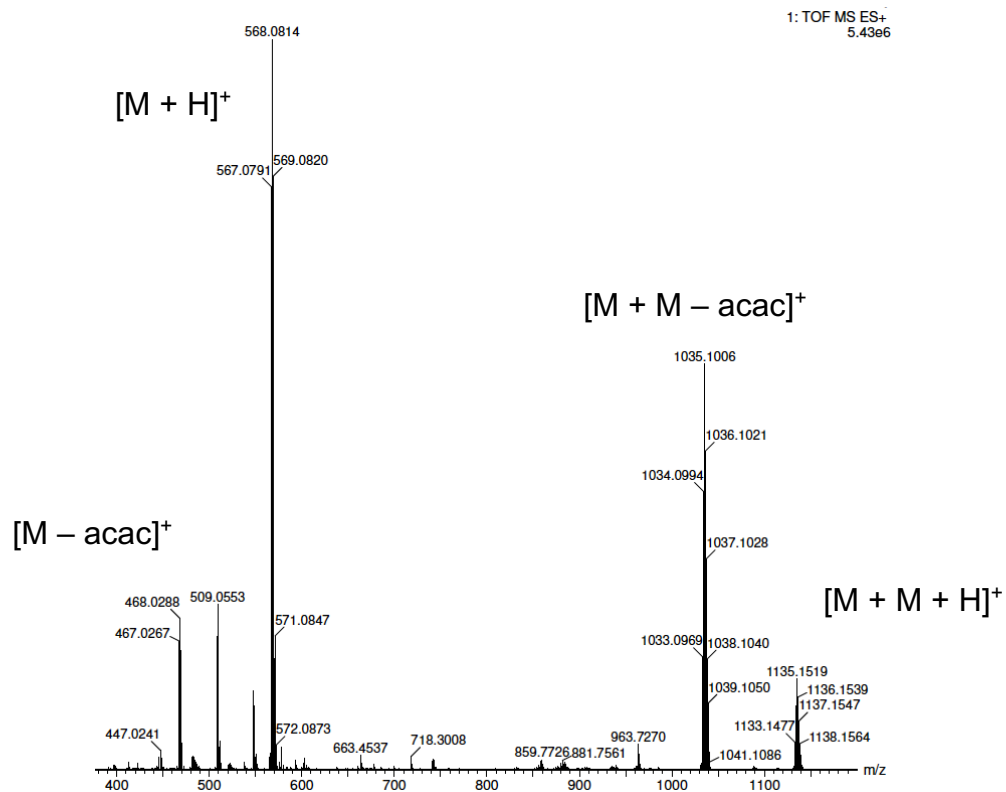

Figure S1. Example of a HRMS spectrum for  $[Pt(L^4)(acac)]$ .

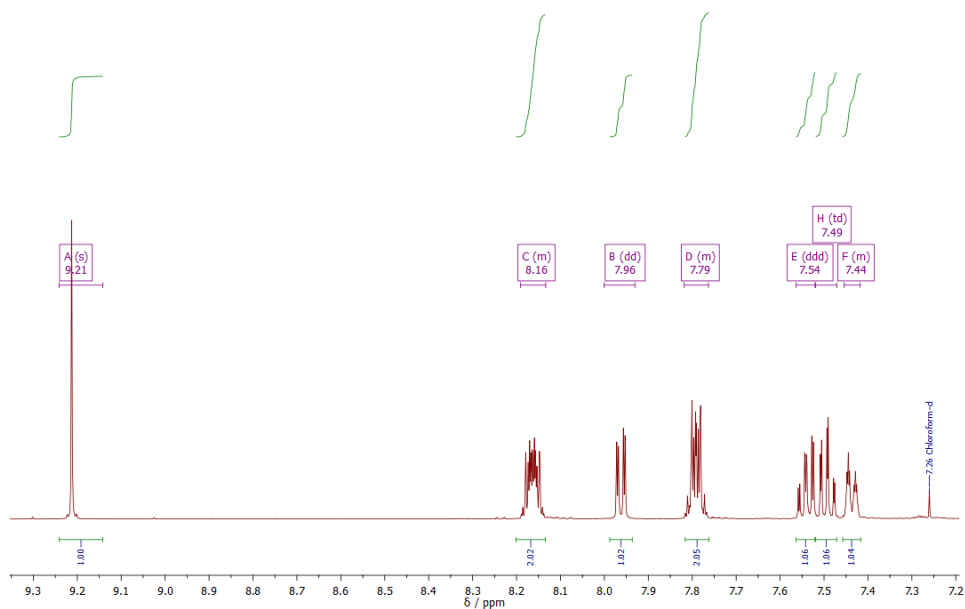

Figure S2.  $^1H$  NMR spectrum for  $HL^1$  (500 MHz,  $CDCl_3$ ).

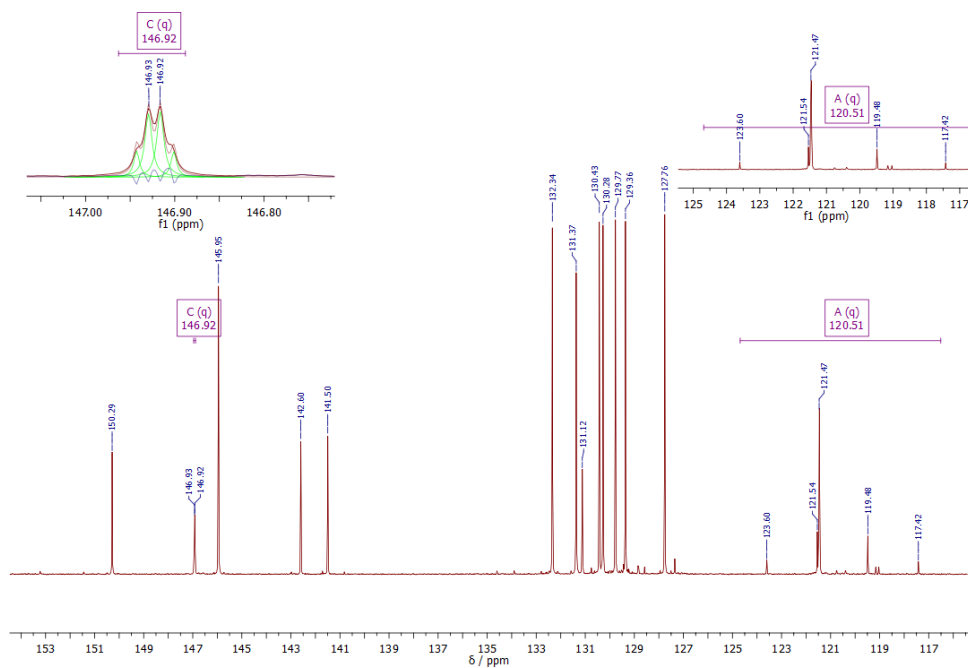

**Figure S3.**  $^{13}\text{C}\{^1\text{H}\}$  NMR spectrum for HL<sup>1</sup> (126 MHz,  $\text{CDCl}_3$ ).

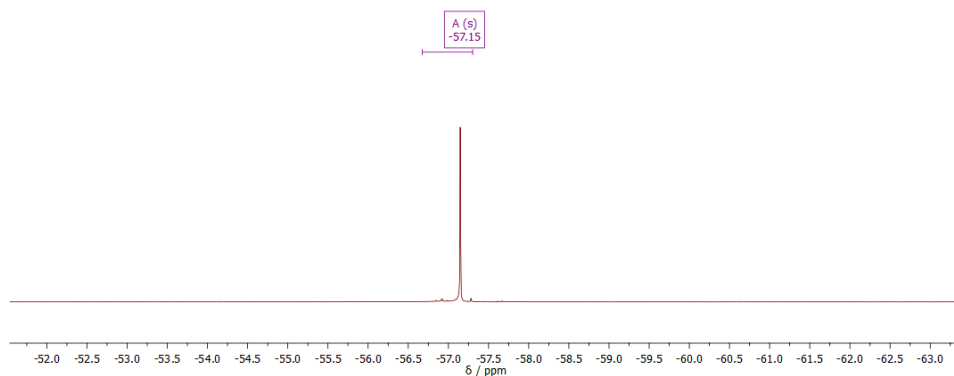

**Figure S4.**  $^{19}\text{F}\{^1\text{H}\}$  NMR spectrum for HL<sup>1</sup> (376 MHz,  $\text{CDCl}_3$ ).

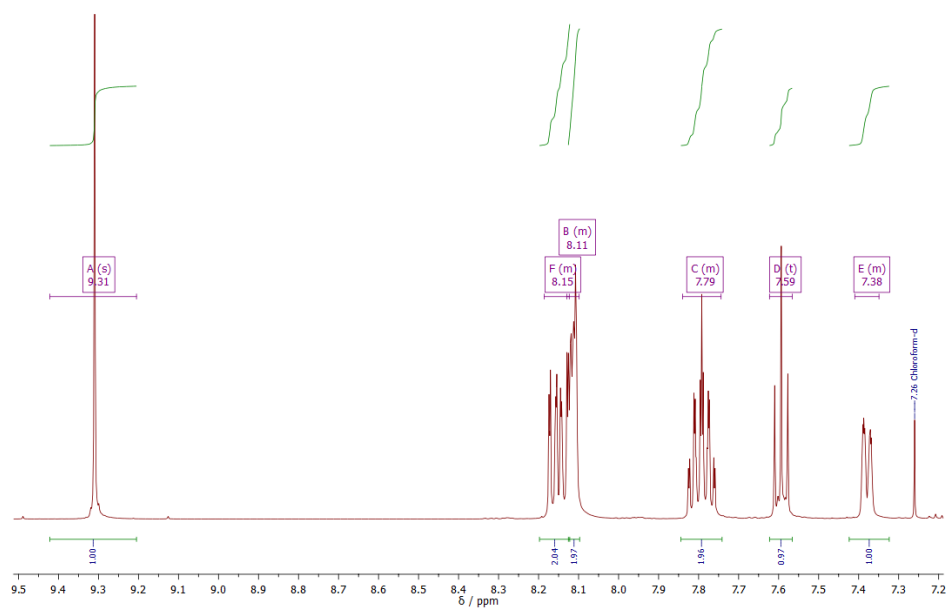

**Figure S5.**  $^1\text{H}$  NMR spectrum for  $\text{HL}^2$  (500 MHz,  $\text{CDCl}_3$ ).

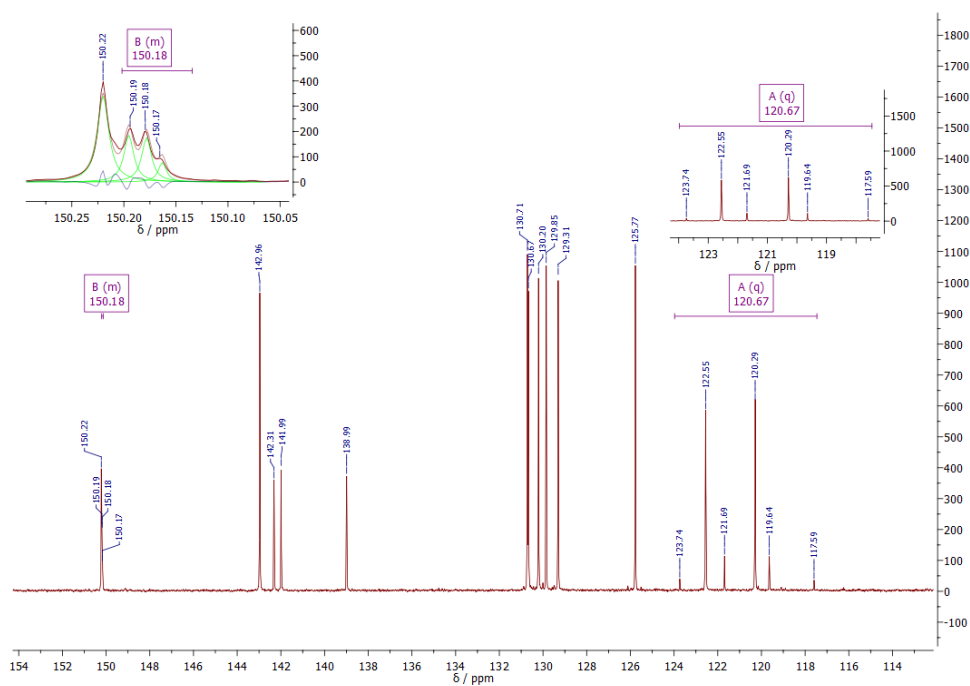

**Figure S6.**  $^{13}\text{C}\{^1\text{H}\}$  NMR spectrum for  $\text{HL}^2$  (126 MHz,  $\text{CDCl}_3$ ).

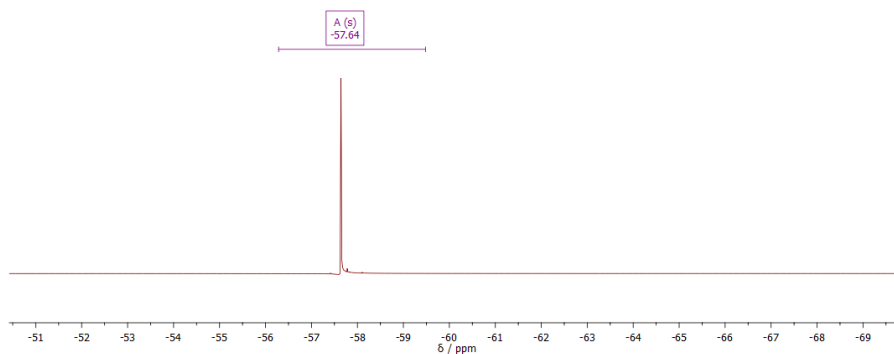

**Figure S7.**  $^{19}\text{F}\{^1\text{H}\}$  NMR spectrum for  $\text{HL}^2$  (376 MHz,  $\text{CDCl}_3$ ).

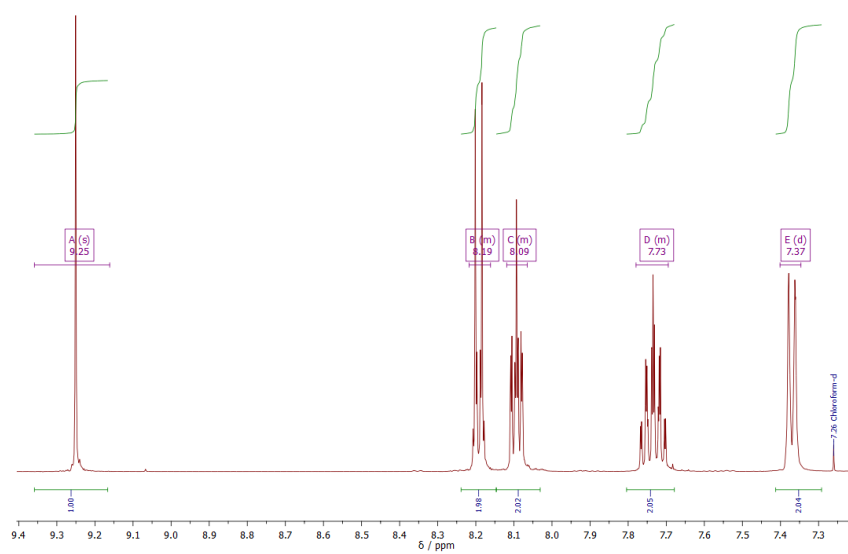

**Figure S8.**  $^1\text{H}$  NMR spectrum for  $\text{HL}^3$  (500 MHz,  $\text{CDCl}_3$ ).

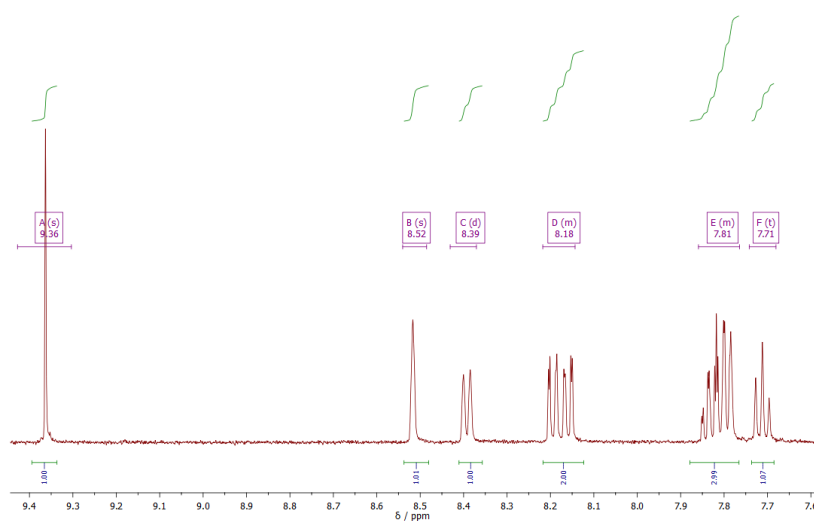

**Figure S9.**  $^1\text{H}$  NMR spectrum for  $\text{HL}^4$  (500 MHz,  $\text{CDCl}_3$ ).

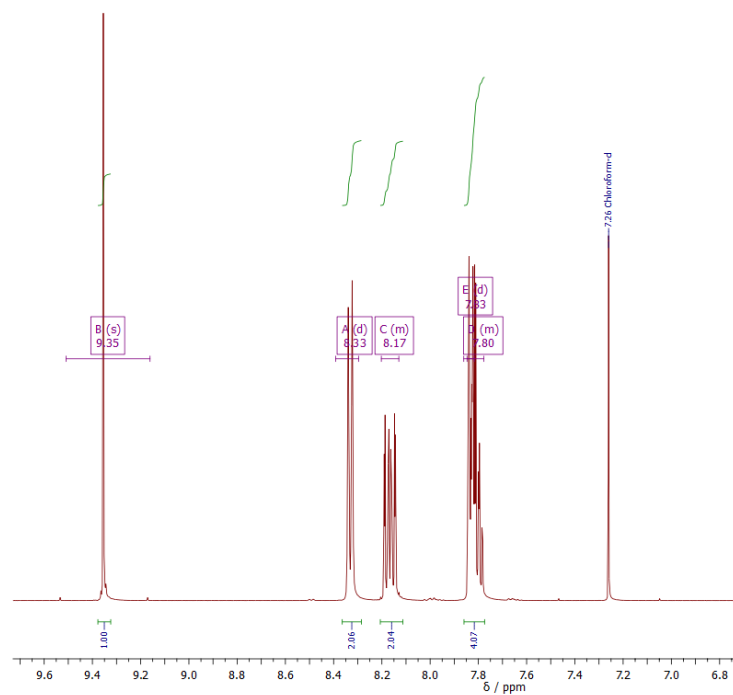

**Figure S10.**  $^1\text{H}$  NMR spectrum for HL<sup>5</sup> (500 MHz,  $\text{CDCl}_3$ ).

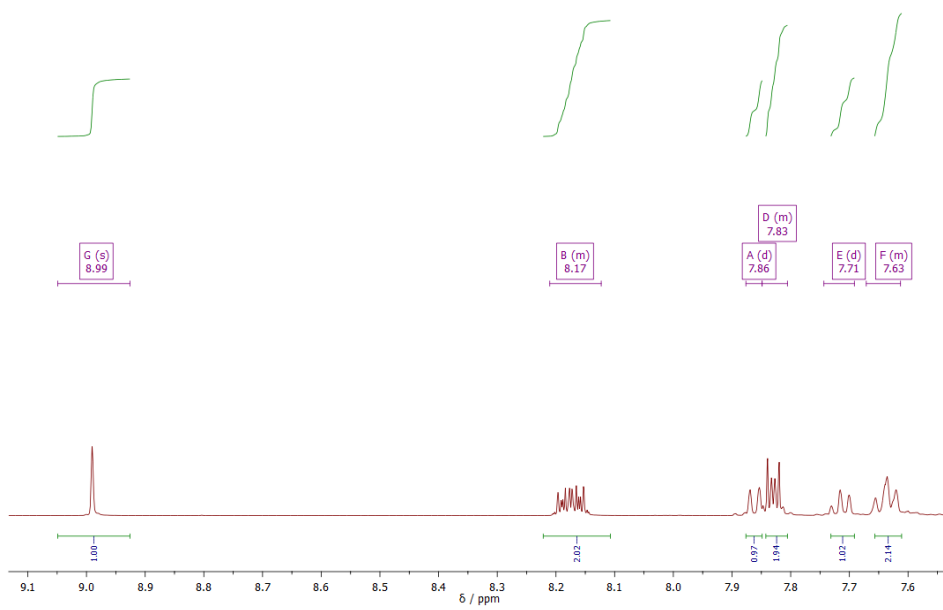

**Figure S11.**  $^1\text{H}$  NMR spectrum for HL<sup>6</sup> (500 MHz,  $\text{CDCl}_3$ ).

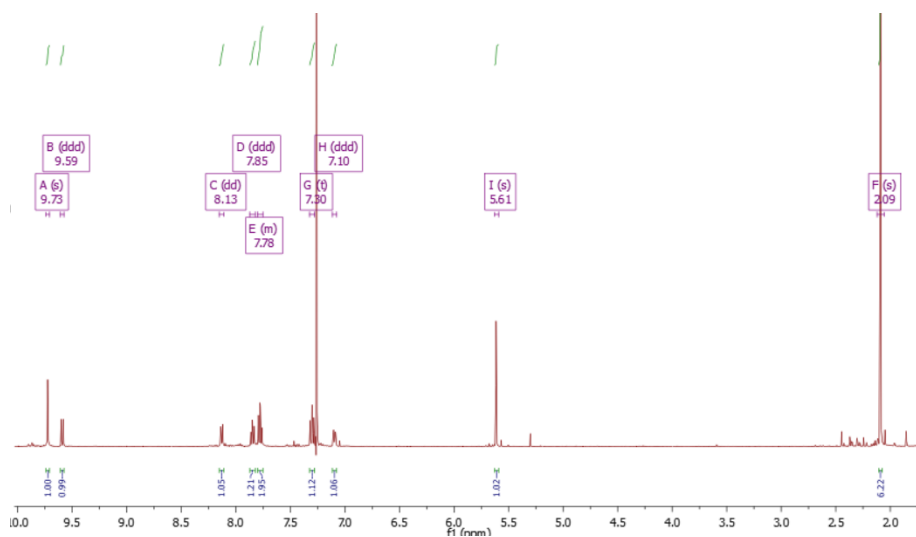

**Figure S12.**  $^1\text{H}$  NMR spectrum for  $[\text{Pt}(\text{L}^1)(\text{acac})]$  (500 MHz,  $\text{CDCl}_3$ ).

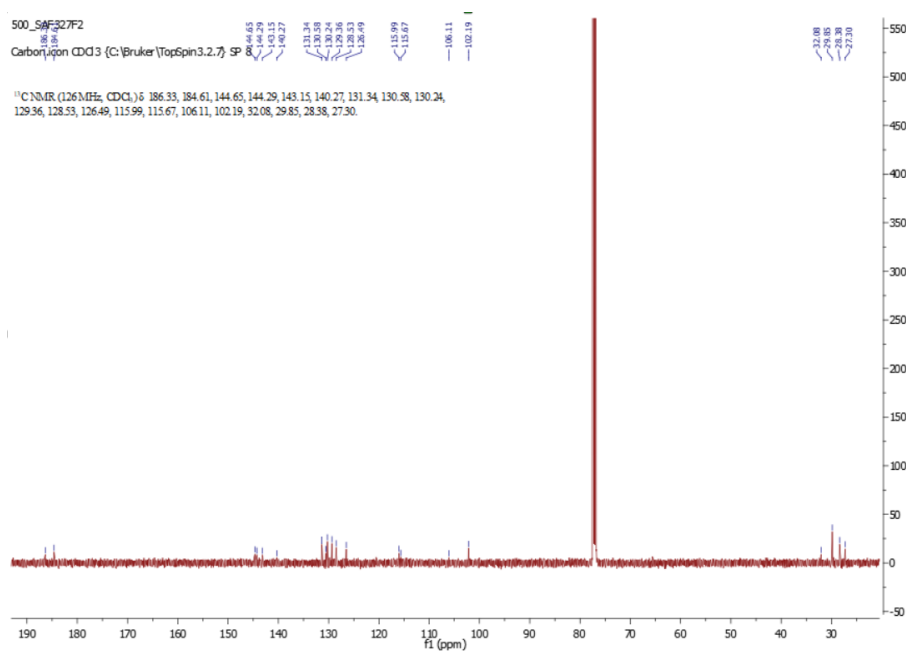

**Figure S13.**  $^{13}\text{C}\{^1\text{H}\}$  NMR spectrum for  $[\text{Pt}(\text{L}^1)(\text{acac})]$  (126 MHz,  $\text{CDCl}_3$ ).



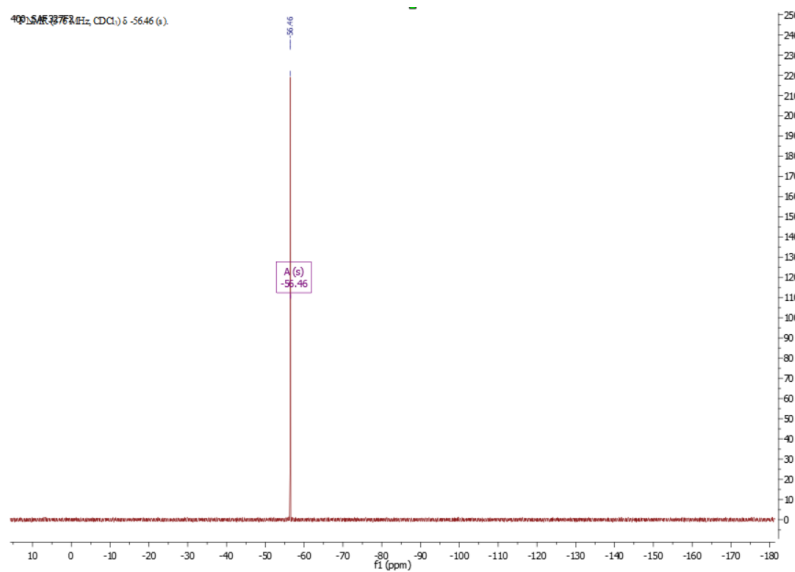

**Figure S14.**  $^{19}\text{F}\{^1\text{H}\}$  NMR spectrum for  $[\text{Pt}(\text{L}^1)(\text{acac})]$  (376 MHz,  $\text{CDCl}_3$ ).

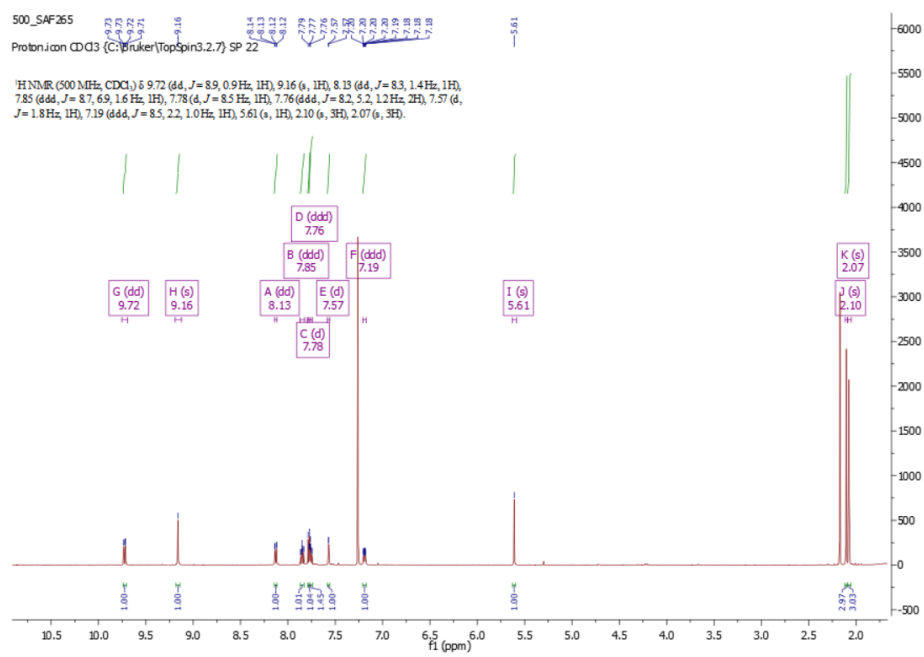

**Figure S15.**  $^1\text{H}$  NMR spectrum for  $[\text{Pt}(\text{L}^2)(\text{acac})]$  (500 MHz,  $\text{CDCl}_3$ ).

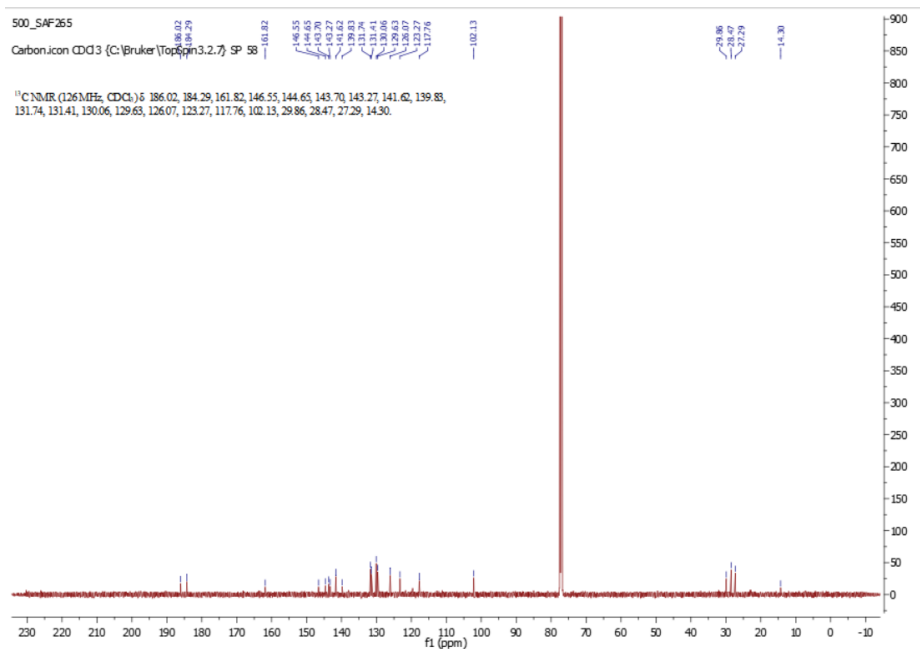

**Figure S16.**  $^{13}\text{C}\{^1\text{H}\}$  NMR spectrum for  $[\text{Pt}(\text{L}^2)(\text{acac})]$  (126 MHz,  $\text{CDCl}_3$ ).

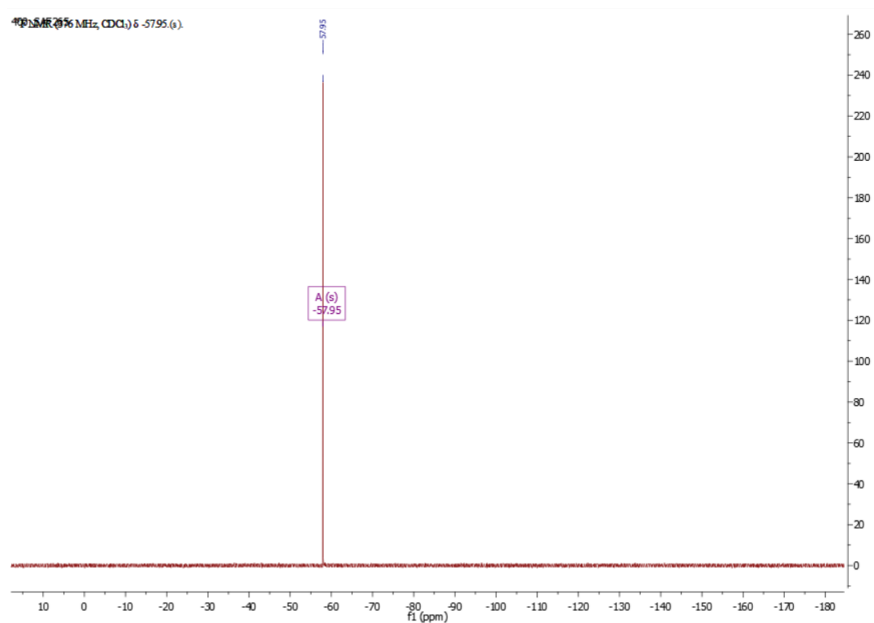

**Figure S17.**  $^{19}\text{F}\{^1\text{H}\}$  NMR spectrum for  $[\text{Pt}(\text{L}^2)(\text{acac})]$  (376 MHz,  $\text{CDCl}_3$ ).

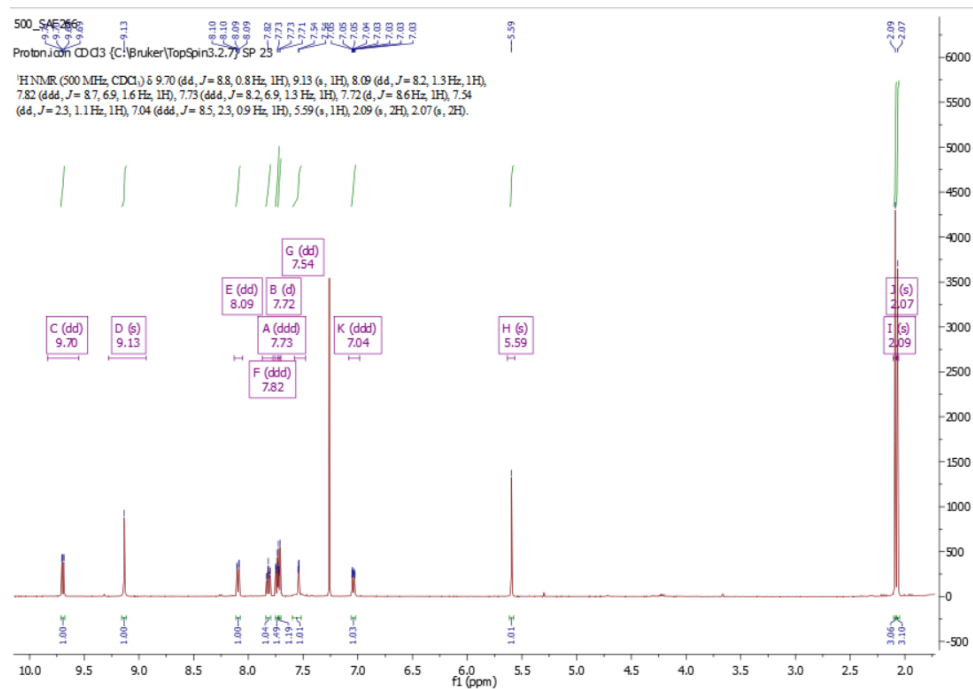

**Figure S18.** <sup>1</sup>H NMR spectrum for [Pt(L<sup>3</sup>)(acac)] (500 MHz, CDCl<sub>3</sub>).

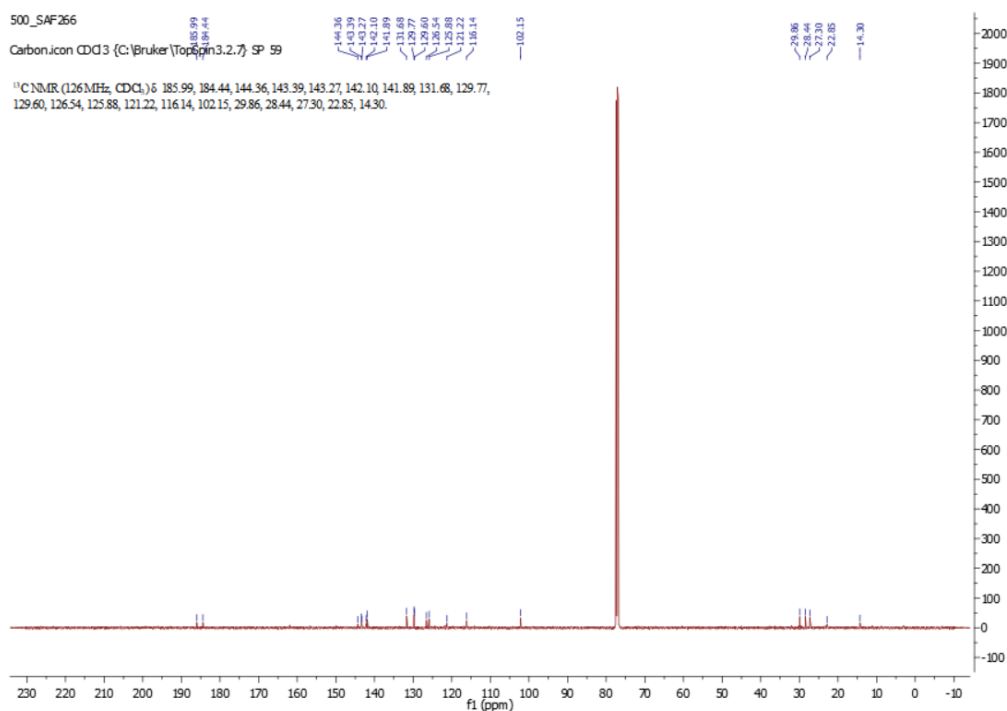

**Figure S19.** <sup>13</sup>C{<sup>1</sup>H} NMR spectrum for [Pt(L<sup>3</sup>)(acac)] (126 MHz, CDCl<sub>3</sub>).

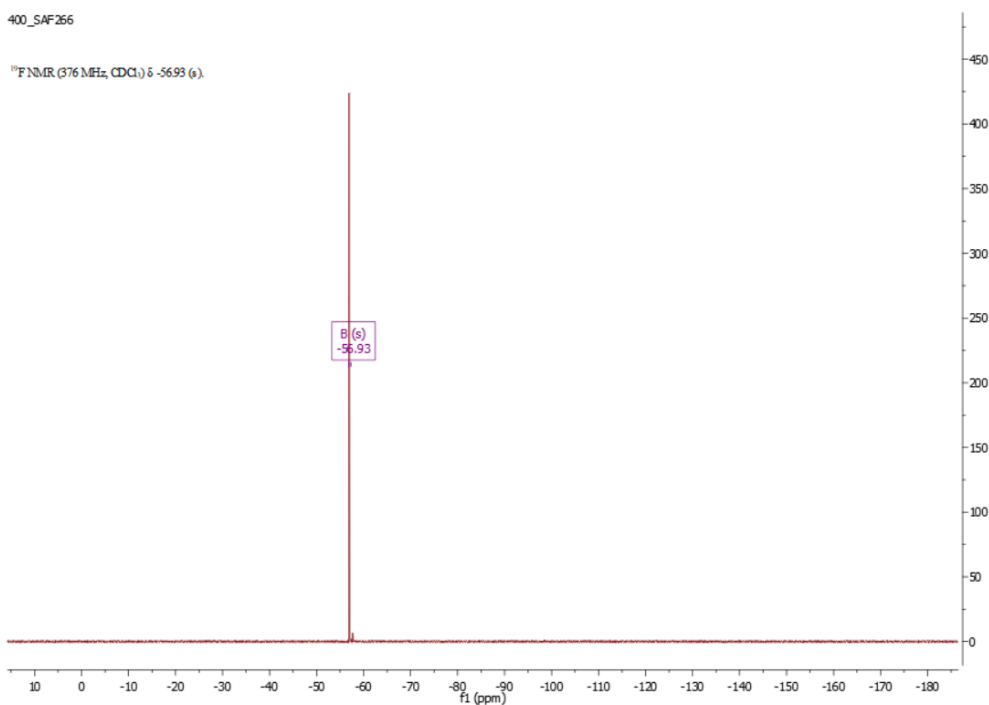

Figure S20.  $^{19}\text{F}\{^1\text{H}\}$  NMR spectrum for  $[\text{Pt}(\text{L}^3)(\text{acac})]$  (376 MHz,  $\text{CDCl}_3$ ).

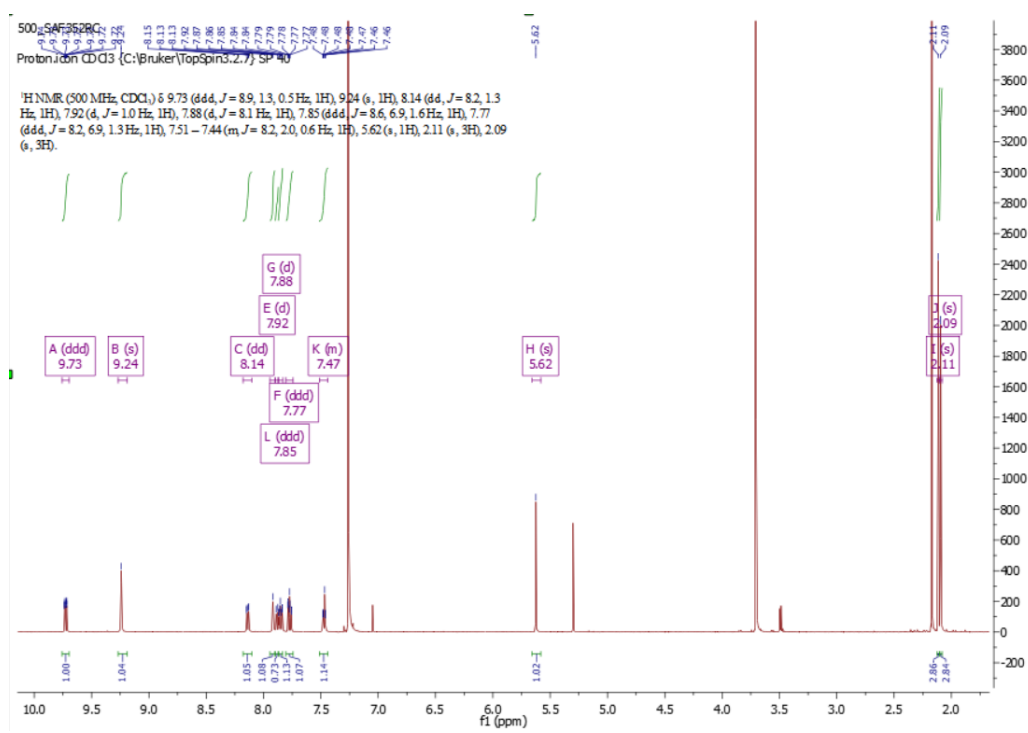

Figure S21.  $^1\text{H}$  NMR spectrum for  $[\text{Pt}(\text{L}^4)(\text{acac})]$  (500 MHz,  $\text{CDCl}_3$ ).

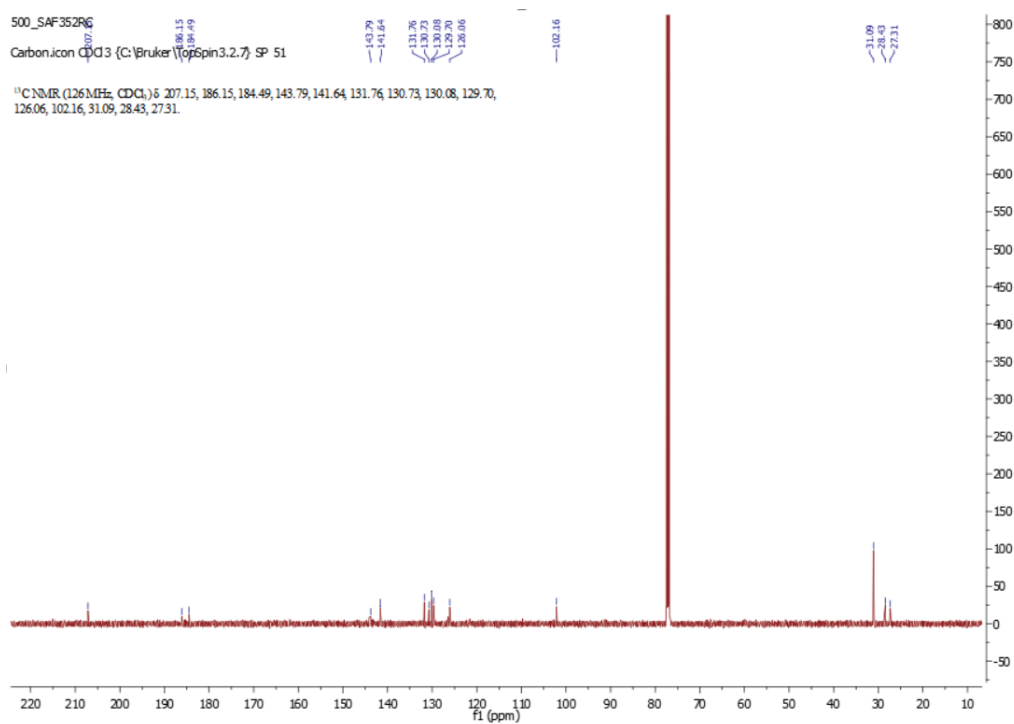

**Figure S22.** <sup>13</sup>C{<sup>1</sup>H} NMR spectrum for [Pt(L<sup>4</sup>)(acac)] (126 MHz, CDCl<sub>3</sub>).

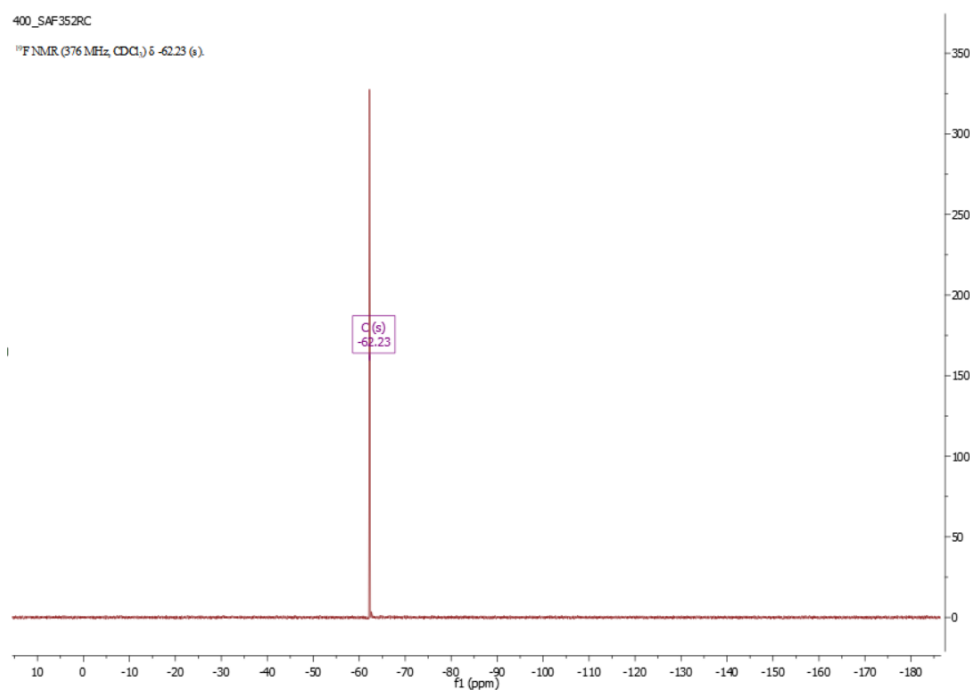

**Figure S23.** <sup>19</sup>F{<sup>1</sup>H} NMR spectrum for [Pt(L<sup>4</sup>)(acac)] (376 MHz, CDCl<sub>3</sub>).

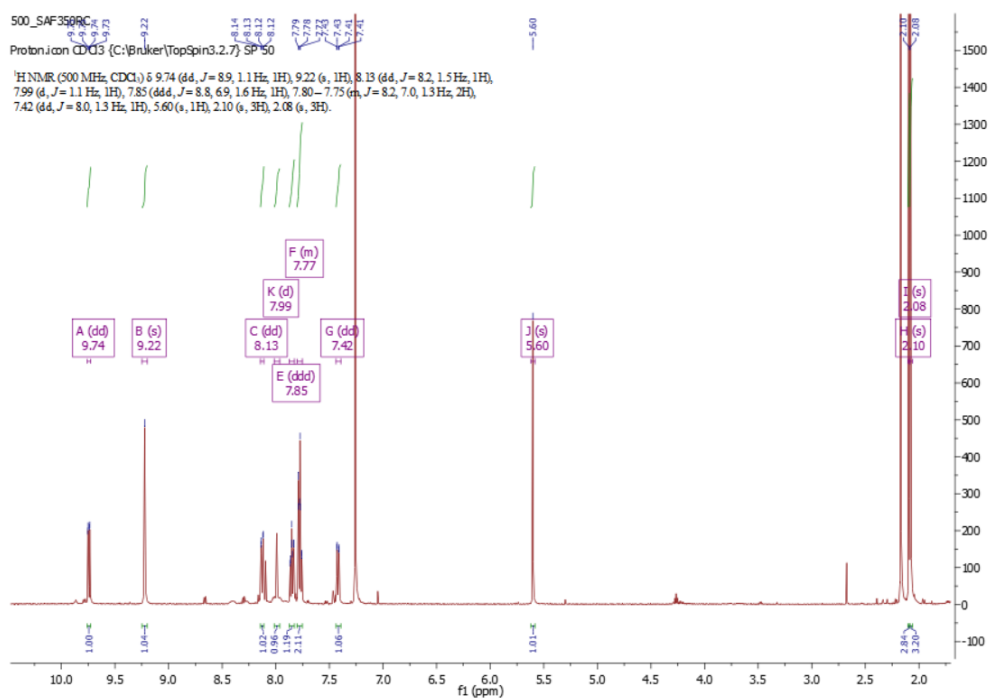

Figure S24. <sup>1</sup>H NMR spectrum for [Pt(L<sup>5</sup>)(acac)] (500 MHz, CDCl<sub>3</sub>).

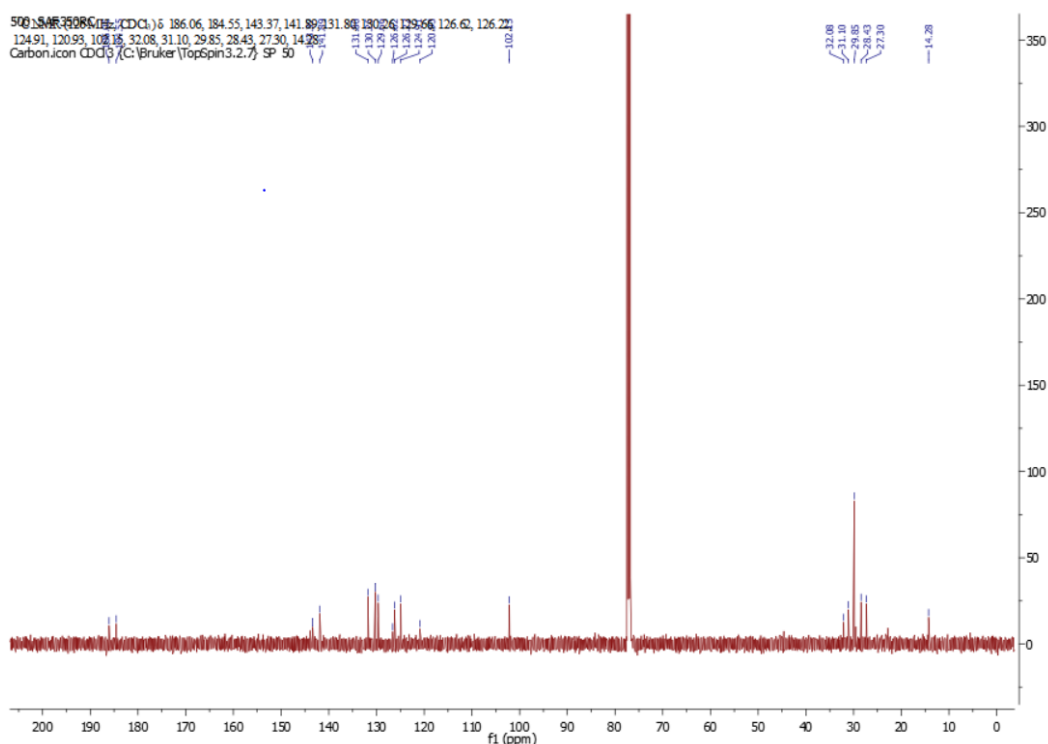

Figure S25. <sup>13</sup>C{<sup>1</sup>H} NMR spectrum for [Pt(L<sup>5</sup>)(acac)] (126 MHz, CDCl<sub>3</sub>).

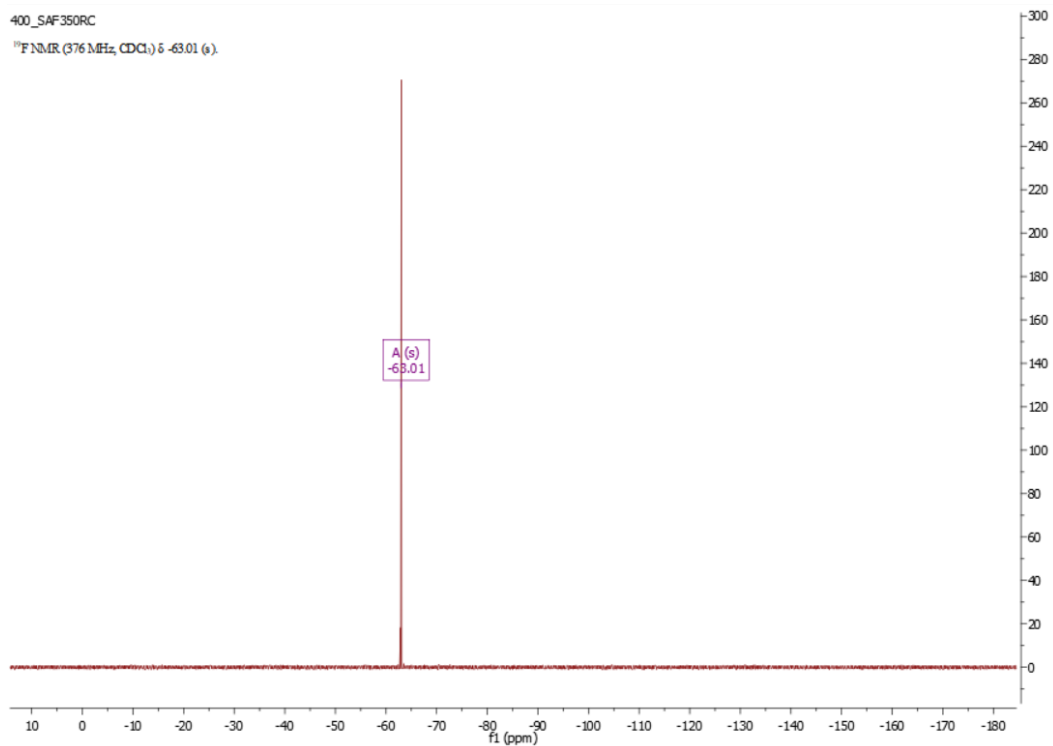

**Figure S26.**  $^{19}\text{F}\{^1\text{H}\}$  NMR spectrum for  $[\text{Pt}(\text{L}^5)(\text{acac})]$  (376 MHz,  $\text{CDCl}_3$ ).

**Table S1.** Data collection parameters for the X-ray crystallography.

| Compound                                       | [Pt(L <sup>1</sup> )(acac)]                                                     | [Pt(L <sup>2</sup> )(acac)]<br>200K                                             | [Pt(L <sup>2</sup> )(acac)]<br>100K                                             | [Pt(L <sup>3</sup> )(acac)]                                                                             |
|------------------------------------------------|---------------------------------------------------------------------------------|---------------------------------------------------------------------------------|---------------------------------------------------------------------------------|---------------------------------------------------------------------------------------------------------|
| Formula                                        | C <sub>20</sub> H <sub>15</sub> F <sub>3</sub> N <sub>2</sub> O <sub>3</sub> Pt | C <sub>20</sub> H <sub>15</sub> F <sub>3</sub> N <sub>2</sub> O <sub>3</sub> Pt | C <sub>20</sub> H <sub>15</sub> F <sub>3</sub> N <sub>2</sub> O <sub>3</sub> Pt | C <sub>20.17</sub> Cl <sub>0.5</sub> F <sub>3</sub> H <sub>15.17</sub> N <sub>2</sub> O <sub>3</sub> Pt |
| <i>D</i> <sub>calc.</sub> / g cm <sup>-3</sup> | 2.112                                                                           | 2.076                                                                           | 2.114                                                                           | 2.113                                                                                                   |
| $\mu$ /mm <sup>-1</sup>                        | 14.812                                                                          | 7.572                                                                           | 7.709                                                                           | 7.525                                                                                                   |
| Formula Weight                                 | 583.43                                                                          | 583.43                                                                          | 583.43                                                                          | 603.37                                                                                                  |
| Colour                                         | red                                                                             | red                                                                             | red                                                                             | red                                                                                                     |
| Shape                                          | blade-shaped                                                                    | lath-shaped                                                                     | needle-shaped                                                                   | block-shaped                                                                                            |
| Size/mm <sup>3</sup>                           | 0.120×0.050×0.010                                                               | 0.12×0.08×0.01                                                                  | 0.233×0.034×0.019                                                               | 0.090×0.080×0.060                                                                                       |
| <i>T</i> /K                                    | 100.0(2)                                                                        | 200(2)                                                                          | 100(2)                                                                          | 100(2)                                                                                                  |
| Crystal System                                 | triclinic                                                                       | triclinic                                                                       | triclinic                                                                       | trigonal                                                                                                |
| Space Group                                    | <i>P</i> -1                                                                     | <i>P</i> -1                                                                     | <i>P</i> -1                                                                     | <i>R</i> -3                                                                                             |
| <i>a</i> /Å                                    | 7.7283(2)                                                                       | 7.6623(2)                                                                       | 7.5818(3)                                                                       | 28.9387(2)                                                                                              |
| <i>b</i> /Å                                    | 11.4387(3)                                                                      | 10.5373(3)                                                                      | 10.4772(4)                                                                      | 28.9387(2)                                                                                              |
| <i>c</i> /Å                                    | 11.5572(3)                                                                      | 12.3368(2)                                                                      | 12.3791(4)                                                                      | 11.76590(10)                                                                                            |
| $\alpha$ /°                                    | 69.743(2)                                                                       | 90.245(2)                                                                       | 91.366(3)                                                                       | 90                                                                                                      |
| $\beta$ /°                                     | 73.859(2)                                                                       | 104.817(2)                                                                      | 106.216(3)                                                                      | 90                                                                                                      |
| $\gamma$ /°                                    | 88.704(2)                                                                       | 103.738(2)                                                                      | 102.858(3)                                                                      | 120                                                                                                     |
| <i>V</i> /Å <sup>3</sup>                       | 917.62(4)                                                                       | 933.16(4)                                                                       | 916.66(6)                                                                       | 8533.23(14)                                                                                             |
| <i>Z</i>                                       | 2                                                                               | 2                                                                               | 2                                                                               | 18                                                                                                      |
| <i>Z'</i>                                      | 1                                                                               | 1                                                                               | 1                                                                               | 1                                                                                                       |
| Wavelength/Å                                   | 1.54178                                                                         | 0.71075                                                                         | 0.71075                                                                         | 0.71075                                                                                                 |
| Radiation type                                 | Cu K $\alpha$                                                                   | Mo K $\alpha$                                                                   | Mo K $\alpha$                                                                   | Mo K $\alpha$                                                                                           |
| $\theta$ <sub>min</sub> /°                     | 4.771                                                                           | 1.712                                                                           | 2.002                                                                           | 2.375                                                                                                   |
| $\theta$ <sub>max</sub> /°                     | 68.274                                                                          | 28.700                                                                          | 28.697                                                                          | 30.504                                                                                                  |
| Measured Refl's.                               | 11962                                                                           | 21485                                                                           | 22148                                                                           | 160283                                                                                                  |
| Indep't Refl's                                 | 11962                                                                           | 4830                                                                            | 4717                                                                            | 5801                                                                                                    |
| Refl's I $\geq$ 2 $\sigma$ (I)                 | 11572                                                                           | 4433                                                                            | 4312                                                                            | 5596                                                                                                    |
| <i>R</i> <sub>int</sub>                        | .                                                                               | 0.0631                                                                          | 0.0460                                                                          | 0.0284                                                                                                  |
| Parameters                                     | 265                                                                             | 301                                                                             | 301                                                                             | 264                                                                                                     |
| Restraints                                     | 0                                                                               | 226                                                                             | 184                                                                             | 0                                                                                                       |
| Largest Peak                                   | 3.752                                                                           | 2.379                                                                           | 3.696                                                                           | 1.490                                                                                                   |
| Deepest Hole                                   | -1.010                                                                          | -1.972                                                                          | -2.555                                                                          | -1.287                                                                                                  |
| GooF                                           | 1.056                                                                           | 1.045                                                                           | 1.033                                                                           | 1.245                                                                                                   |
| <i>wR</i> <sub>2</sub> (all data)              | 0.1028                                                                          | 0.0753                                                                          | 0.0708                                                                          | 0.0500                                                                                                  |
| <i>wR</i> <sub>2</sub>                         | 0.1021                                                                          | 0.0743                                                                          | 0.0691                                                                          | 0.0496                                                                                                  |
| <i>R</i> <sub>1</sub> (all data)               | 0.0396                                                                          | 0.0329                                                                          | 0.0369                                                                          | 0.0227                                                                                                  |
| <i>R</i> <sub>1</sub>                          | 0.0386                                                                          | 0.0293                                                                          | 0.0311                                                                          | 0.0214                                                                                                  |



**Table S2.** Bond lengths (Å) for the crystal structures.

| [Pt(L <sup>1</sup> )(acac)] |                  |           | [Pt(L <sup>3</sup> )(acac)] |                  |           |
|-----------------------------|------------------|-----------|-----------------------------|------------------|-----------|
| Pt1                         | Pt1 <sup>1</sup> | 3.2041(6) | Pt1                         | Pt1 <sup>1</sup> | 3.2586(2) |
| Pt1                         | O21              | 2.000(5)  | Pt1                         | O21              | 2.094(2)  |
| Pt1                         | O22              | 2.108(5)  | Pt1                         | O22              | 1.994(2)  |
| Pt1                         | N1               | 2.041(6)  | Pt1                         | N1               | 2.044(2)  |
| Pt1                         | C1               | 1.967(8)  | Pt1                         | C1               | 1.965(3)  |

  

| [Pt(L <sup>2</sup> )(acac)] 200K |                  |           | [Pt(L <sup>2</sup> )(acac)] 100K |                  |           |
|----------------------------------|------------------|-----------|----------------------------------|------------------|-----------|
| Pt1                              | Pt1 <sup>1</sup> | 3.2199(3) | Pt1                              | Pt1 <sup>1</sup> | 3.2020(3) |
| Pt1                              | O21              | 1.996(3)  | Pt1                              | O21              | 1.994(3)  |
| Pt1                              | O22              | 2.103(3)  | Pt1                              | O22              | 2.104(3)  |
| Pt1                              | N1               | 2.034(3)  | Pt1                              | N1               | 2.044(4)  |
| Pt1                              | C1               | 1.967(4)  | Pt1                              | C1               | 1.973(4)  |

**Table S3.** Bond angles (°) for the crystal structures.

| [Pt(L <sup>1</sup> )(acac)] |     |                  |           | [Pt(L <sup>3</sup> )(acac)] |     |     |           |
|-----------------------------|-----|------------------|-----------|-----------------------------|-----|-----|-----------|
| O21                         | Pt1 | Pt1 <sup>1</sup> | 86.48(16) | O22                         | Pt1 | O21 | 89.19(8)  |
| O21                         | Pt1 | O22              | 88.4(2)   | O22                         | Pt1 | N1  | 169.27(9) |
| O21                         | Pt1 | N1               | 169.9(2)  | N1                          | Pt1 | O21 | 100.39(9) |
| O22                         | Pt1 | Pt1 <sup>1</sup> | 81.10(15) | C1                          | Pt1 | O21 | 175.94(9) |
| N1                          | Pt1 | Pt1 <sup>1</sup> | 98.49(18) | C1                          | Pt1 | O22 | 88.96(10) |
| N1                          | Pt1 | O22              | 101.1(2)  | C1                          | Pt1 | N1  | 81.16(10) |
| C1                          | Pt1 | Pt1 <sup>1</sup> | 105.1(2)  |                             |     |     |           |
| C1                          | Pt1 | O21              | 89.7(3)   |                             |     |     |           |
| C1                          | Pt1 | O22              | 173.4(2)  |                             |     |     |           |
| C1                          | Pt1 | N1               | 80.5(3)   |                             |     |     |           |

  

| [Pt(L <sup>2</sup> )(acac)] 200K |     |                  |            | [Pt(L <sup>2</sup> )(acac)] 100K |     |                  |            |
|----------------------------------|-----|------------------|------------|----------------------------------|-----|------------------|------------|
| O21                              | Pt1 | Pt1 <sup>1</sup> | 90.16(9)   | O21                              | Pt1 | Pt1 <sup>1</sup> | 88.83(9)   |
| O21                              | Pt1 | O22              | 88.71(12)  | O21                              | Pt1 | O22              | 88.97(13)  |
| O21                              | Pt1 | N1               | 170.10(12) | O21                              | Pt1 | N1               | 169.96(14) |
| O22                              | Pt1 | Pt1 <sup>1</sup> | 83.48(8)   | O22                              | Pt1 | Pt1 <sup>1</sup> | 83.01(9)   |
| N1                               | Pt1 | Pt1 <sup>1</sup> | 93.62(9)   | N1                               | Pt1 | Pt1 <sup>1</sup> | 94.90(10)  |
| N1                               | Pt1 | O22              | 100.80(13) | N1                               | Pt1 | O22              | 100.71(14) |
| C1                               | Pt1 | Pt1 <sup>1</sup> | 102.22(11) | C1                               | Pt1 | Pt1 <sup>1</sup> | 102.97(12) |
| C1                               | Pt1 | O21              | 89.38(16)  | C1                               | Pt1 | O21              | 89.05(17)  |
| C1                               | Pt1 | O22              | 174.00(12) | C1                               | Pt1 | O22              | 173.67(15) |
| C1                               | Pt1 | N1               | 80.88(15)  | C1                               | Pt1 | N1               | 81.04(17)  |

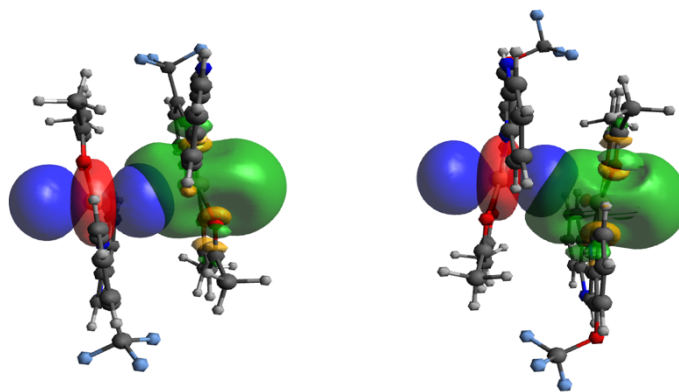

**Figure S27.** Pictorial description of the natural bonding orbital (NBO) analyses of the interaction between the two Pt atoms of  $[\text{Pt}(\text{L}^1)(\text{acac})]$  (left) and  $[\text{Pt}(\text{L}^2)(\text{acac})]$ .

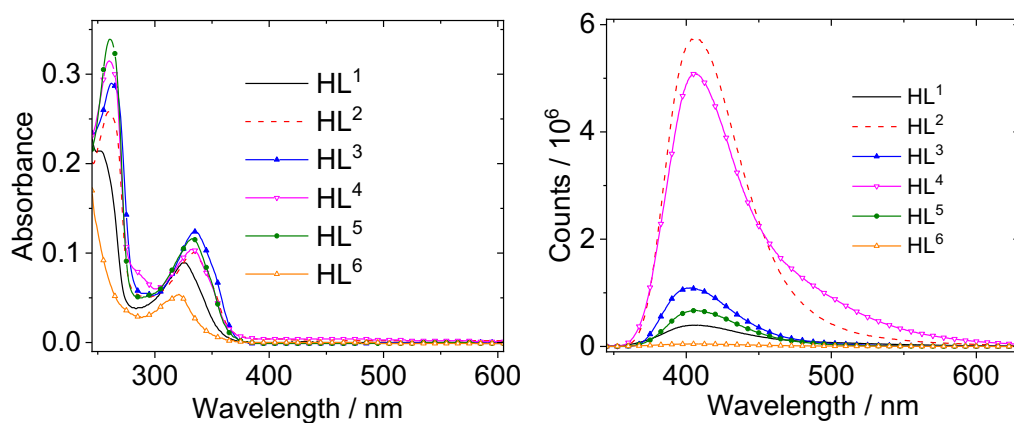

**Figure S28.** UV-vis. spectra of the ligands (*left*) and corresponding steady state emission spectra (*right*). All using  $10^{-5}$  M  $\text{CHCl}_3$  solutions.

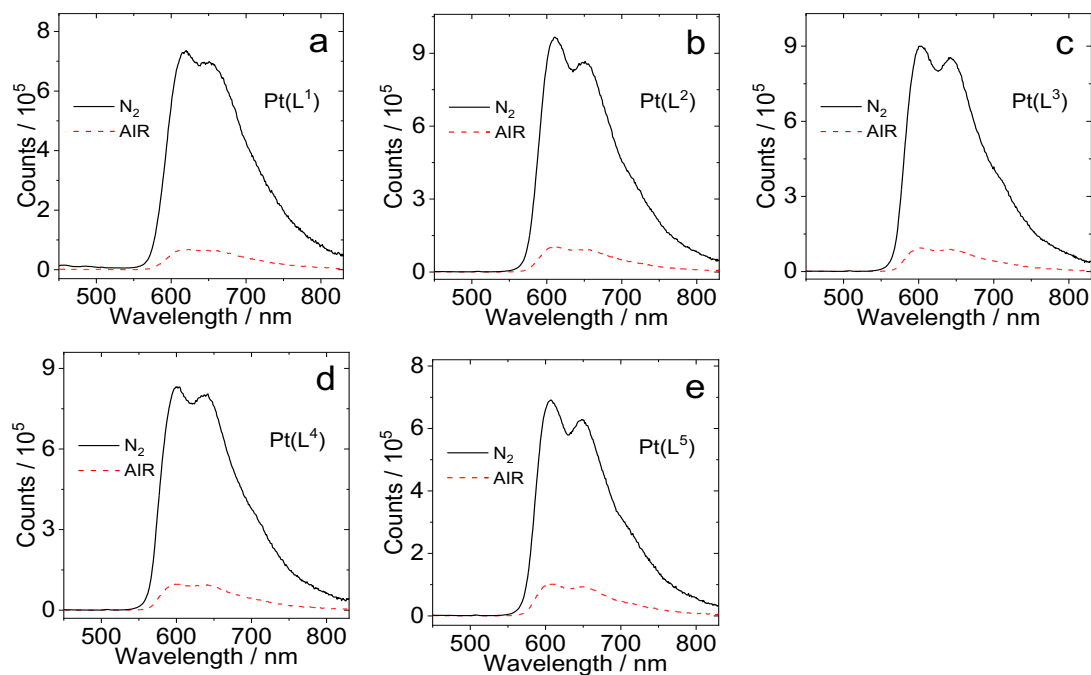

**Figure S29.** Phosphorescence emission spectra of (a) [Pt(L<sup>1</sup>)(acac)], (b) [Pt(L<sup>2</sup>)(acac)], (c) [Pt(L<sup>3</sup>)(acac)], (d) [Pt(L<sup>4</sup>)(acac)] and (e) [Pt(L<sup>5</sup>)(acac)] in *deoxygenated* and *aerated* toluene solution. Optically matched solutions were used (all the solution show the same absorbance at the excitation wavelength,  $\lambda_{\text{ex}} = 440$  nm,  $A_{440 \text{ nm}} = 0.1$ ). 25 °C.

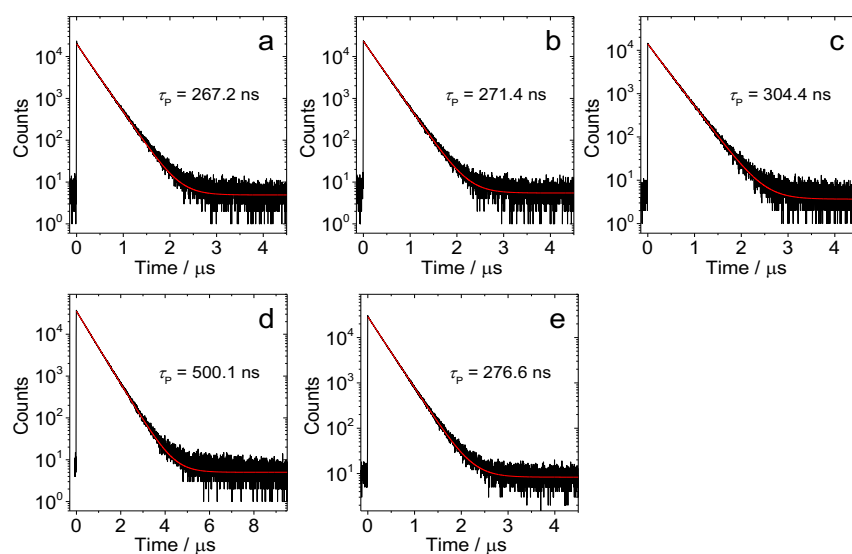

**Figure S30.** Phosphorescence decay traces of (a) [Pt(L<sup>1</sup>)(acac)], (b) [Pt(L<sup>2</sup>)(acac)], (c) [Pt(L<sup>3</sup>)(acac)], (d) [Pt(L<sup>4</sup>)(acac)] and (e) [Pt(L<sup>5</sup>)(acac)] at 750 nm in aerated toluene.  $\lambda_{\text{ex}} = 405 \text{ nm}$ ,  $A_{405 \text{ nm}} = 0.1$ ,  $25 \text{ }^\circ\text{C}$ .

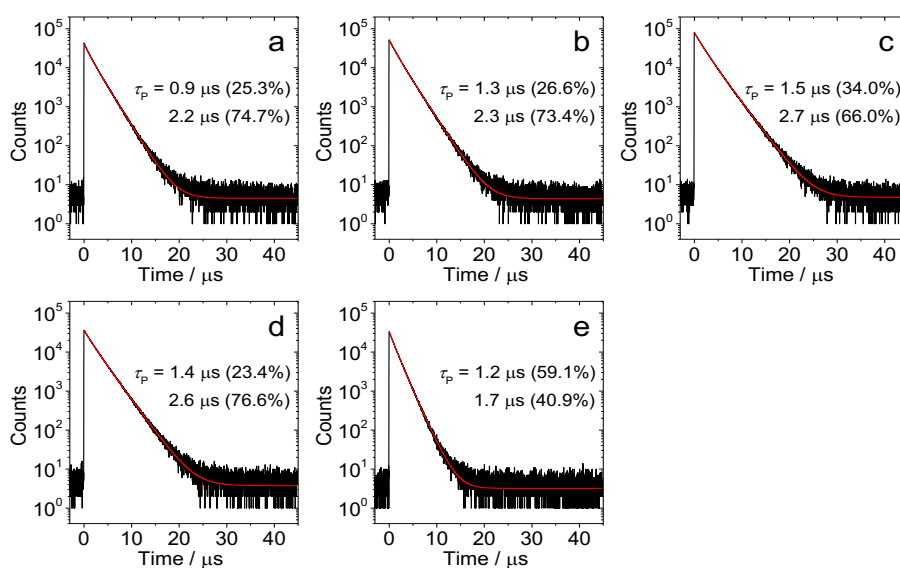

**Figure S31.** Phosphorescence decay traces of (a) [Pt(L<sup>1</sup>)(acac)], (b) [Pt(L<sup>2</sup>)(acac)], (c) [Pt(L<sup>3</sup>)(acac)], (d) [Pt(L<sup>4</sup>)(acac)] and (e) [Pt(L<sup>5</sup>)(acac)] at 750 nm in deoxygenated toluene.  $\lambda_{\text{ex}} = 405 \text{ nm}$ ,  $A_{405 \text{ nm}} = 0.1$ ,  $25 \text{ }^\circ\text{C}$ .

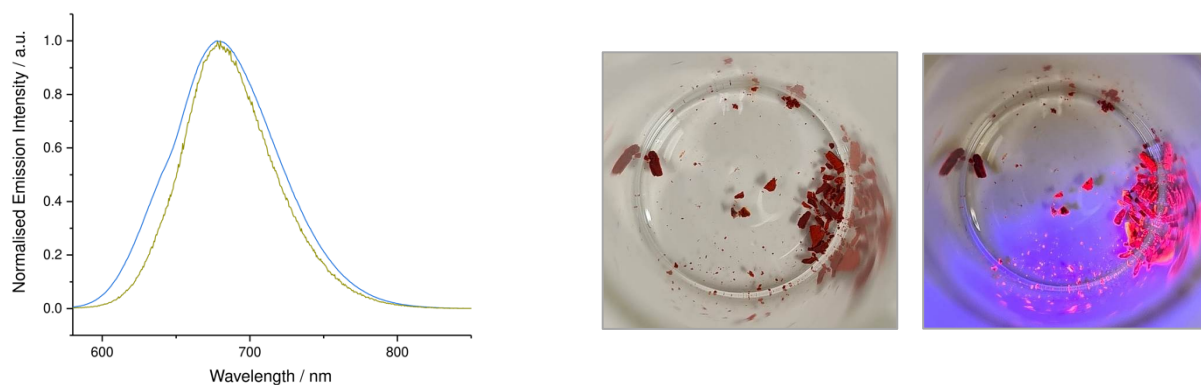

**Figure S32.** Left: Steady state spectra ( $\lambda_{\text{ex}} = 550 \text{ nm}$ ) recorded in the solid state for  $[\text{Pt}(\text{L}^2)(\text{acac})]$  (blue) and  $[\text{Pt}(\text{L}^5)(\text{acac})]$  (green). Right: Photographs of crystalline  $[\text{Pt}(\text{L}^2)(\text{acac})]$  under ambient light (left) and UV irradiation (right).

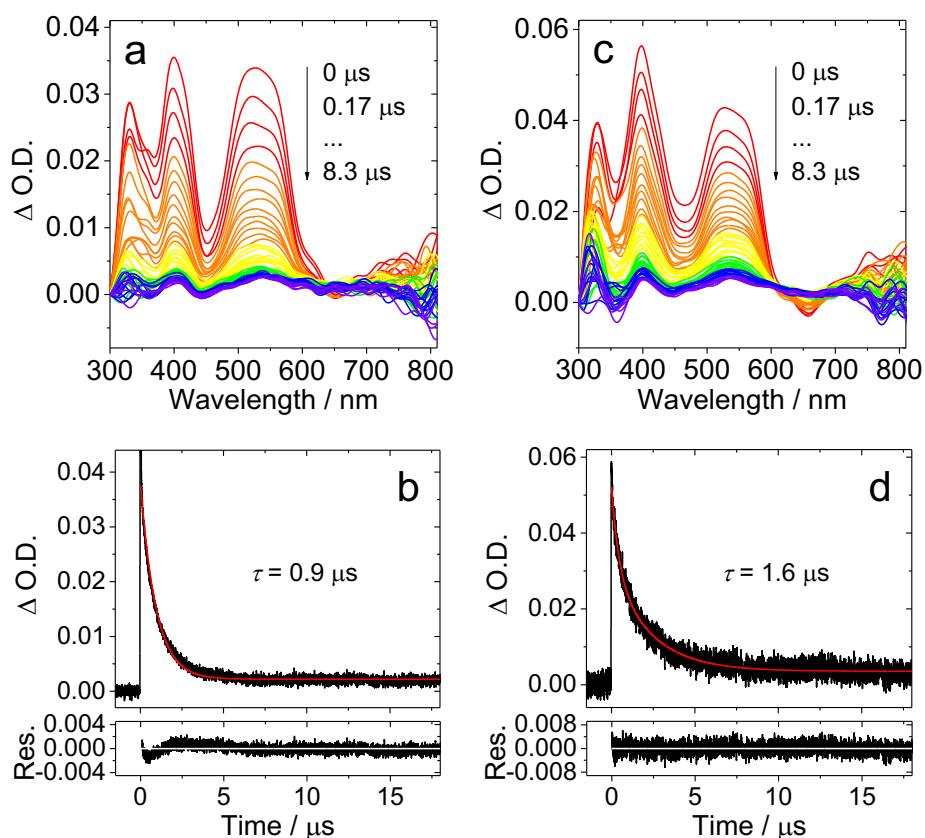

**Figure S33.** Nanosecond transient absorption spectra of (a)  $[\text{Pt}(\text{L}^4)(\text{acac})]$  and (c)  $[\text{Pt}(\text{L}^5)(\text{acac})]$  and the decay trace of (b)  $[\text{Pt}(\text{L}^4)(\text{acac})]$  and (d)  $[\text{Pt}(\text{L}^5)(\text{acac})]$  at 540 nm in *deaerated* toluene excited with nanosecond pulsed laser.  $\lambda_{\text{ex}} = 355 \text{ nm}$ .  $c = 3.0 \times 10^{-5} \text{ M}$ , 25 °C.

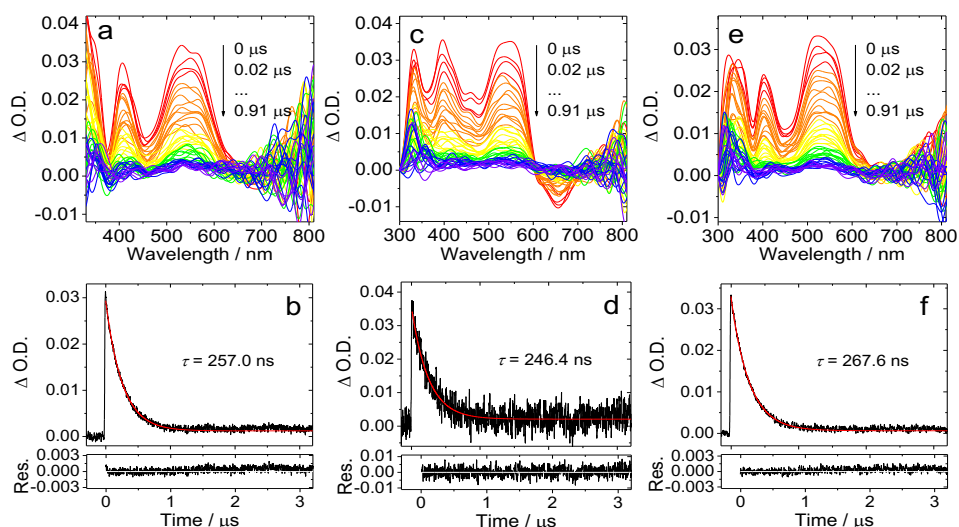

**Figure S34.** Nanosecond transient absorption spectra of (a) [Pt(L<sup>1</sup>)(acac)], (c) [Pt(L<sup>2</sup>)(acac)] and (e) [Pt(L<sup>3</sup>)(acac)] and the decay trace of (b) [Pt(L<sup>1</sup>)(acac)], (d) [Pt(L<sup>2</sup>)(acac)] and (f) [Pt(L<sup>3</sup>)(acac)] at 540 nm in aerated toluene excited with nanosecond pulsed laser.  $\lambda_{\text{ex}} = 355 \text{ nm}$ .  $c = 3.0 \times 10^{-5} \text{ M}$ , 25 °C.

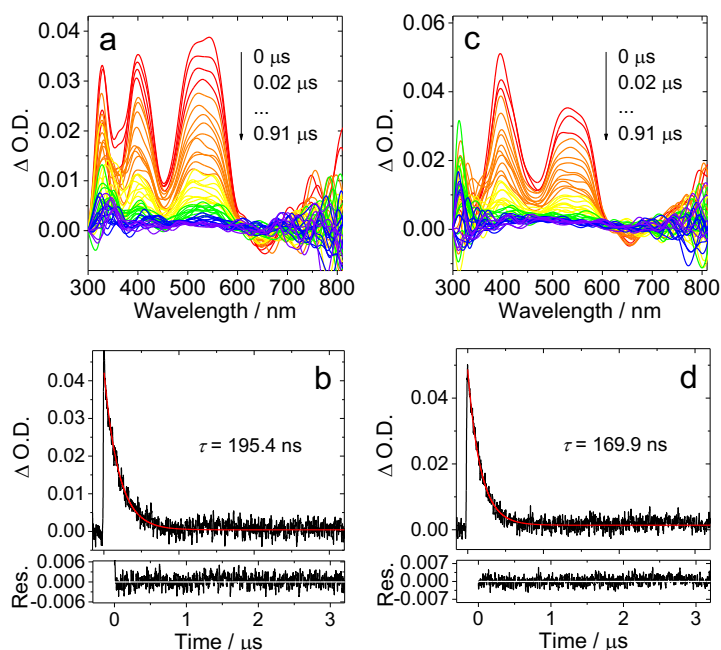

**Figure S35.** Nanosecond transient absorption spectra of (a) [Pt(L<sup>4</sup>)(acac)] and (c) [Pt(L<sup>5</sup>)(acac)] and the decay trace of (b) [Pt(L<sup>4</sup>)(acac)] and (d) [Pt(L<sup>5</sup>)(acac)] at 540 nm in aerated toluene excited with nanosecond pulsed laser.  $\lambda_{\text{ex}} = 355 \text{ nm}$ .  $c = 3.0 \times 10^{-5} \text{ M}$ , 25 °C.

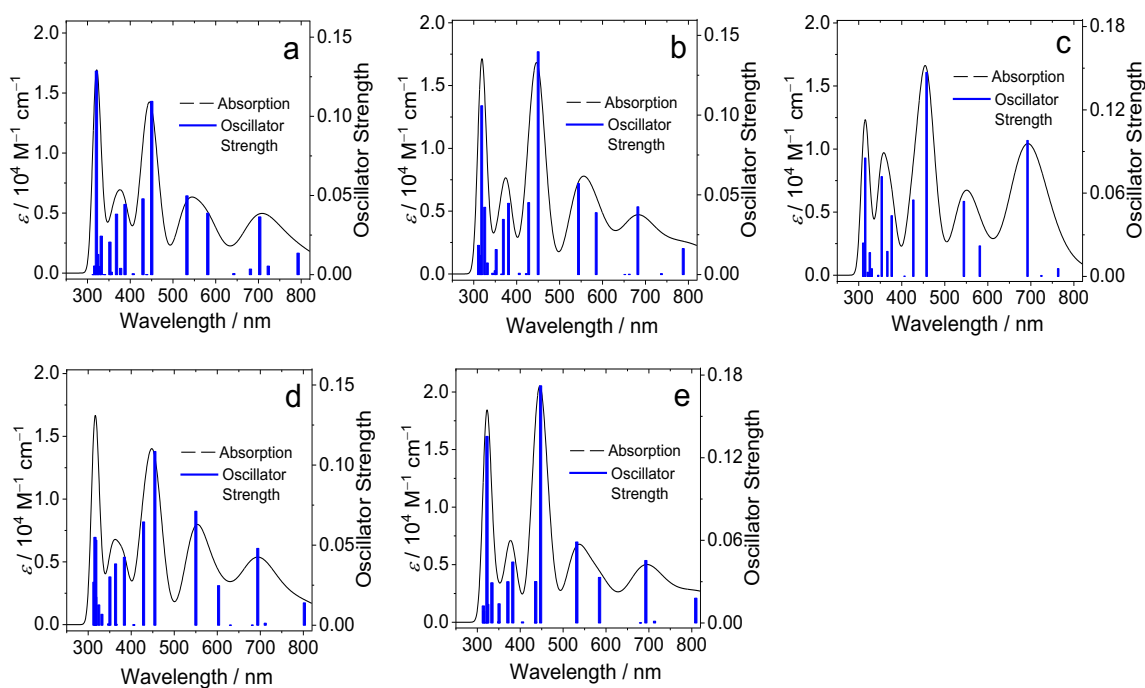

**Figure S36.** The calculated transient absorption spectra of (a) [Pt(L<sup>1</sup>)(acac)], (b) [Pt(L<sup>2</sup>)(acac)], (c) [Pt(L<sup>3</sup>)(acac)], (d) [Pt(L<sup>4</sup>)(acac)] and (e) [Pt(L<sup>5</sup>)(acac)], i.e. the T<sub>1</sub>→T<sub>n</sub> transitions. The calculations were performed by TDDFT at the B3LYP/GENECP level in vacuum using Gaussian 09, based on the optimized triplet excited state (T<sub>1</sub>) geometries performed by DFT at the B3LYP/GENECP level using Gaussian 09. The computation was performed under vacuum condition (no solvent was used for the computation).

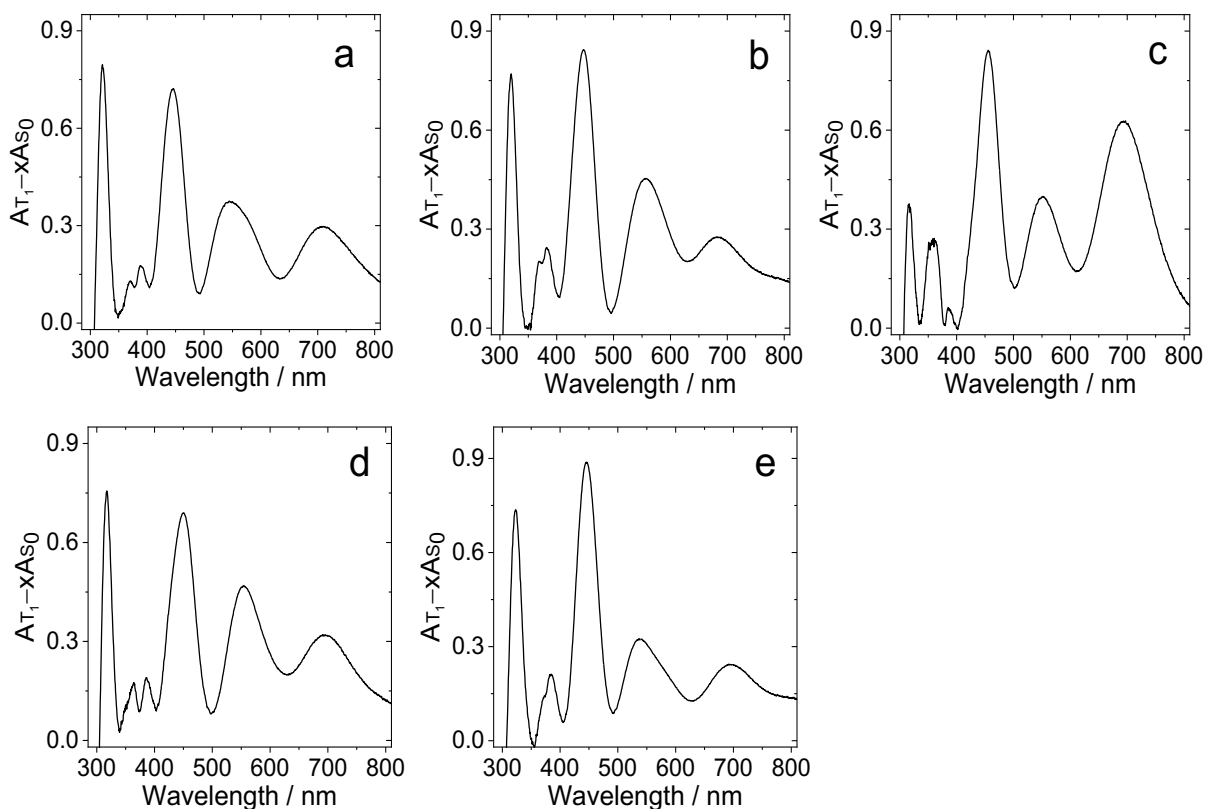

**Figure S37.** Absorbance differential spectrum of (a) [Pt(L<sup>1</sup>)(acac)], (b) [Pt(L<sup>2</sup>)(acac)], (c) [Pt(L<sup>3</sup>)(acac)], (d) [Pt(L<sup>4</sup>)(acac)] and (e) [Pt(L<sup>5</sup>)(acac)], obtained by normalized transient absorption spectra minus a product of normalized UV-vis spectra and the coefficient (between 0~1), to simulate the nanosecond transient absorption spectra of the excited state absorption band overlapping the ground state band. The calculations for transient absorption are performed by TDDFT at the B3LYP/GENECP level in vacuum using Gaussian 09, based on the optimized triplet excited state geometries (performed by DFT at the B3LYP/GENECP level using Gaussian 09. In vacuum, no solvents were used).



**Table S4.** Electronic excitation energies (eV) and corresponding oscillator strengths ( $f$ ) of the low-lying electronically excited states of the complexes. Performed by TDDFT at the B3LYP/GENECP level. No solvents were used in the calculations (under vacuum condition).

| Compounds                   | Electronic transition            | Energy (ev) | Wavelength (nm) | $f$    |
|-----------------------------|----------------------------------|-------------|-----------------|--------|
| [Pt(L <sup>1</sup> )(acac)] | T <sub>1</sub> → T <sub>10</sub> | 1.7648      | 703             | 0.0365 |
|                             | T <sub>1</sub> → T <sub>13</sub> | 2.1340      | 581             | 0.0388 |
|                             | T <sub>1</sub> → T <sub>14</sub> | 2.3305      | 532             | 0.0498 |
|                             | T <sub>1</sub> → T <sub>15</sub> | 2.7574      | 450             | 0.1095 |
|                             | T <sub>1</sub> → T <sub>17</sub> | 2.8881      | 429             | 0.0479 |
|                             | T <sub>1</sub> → T <sub>19</sub> | 3.2019      | 387             | 0.0444 |
|                             | T <sub>1</sub> → T <sub>28</sub> | 3.8715      | 320             | 0.1286 |
| [Pt(L <sup>2</sup> )(acac)] | T <sub>1</sub> → T <sub>10</sub> | 1.8180      | 682             | 0.0425 |
|                             | T <sub>1</sub> → T <sub>14</sub> | 2.2803      | 544             | 0.0571 |
|                             | T <sub>1</sub> → T <sub>15</sub> | 2.7572      | 450             | 0.1397 |
|                             | T <sub>1</sub> → T <sub>16</sub> | 2.8989      | 428             | 0.0451 |
|                             | T <sub>1</sub> → T <sub>19</sub> | 3.2581      | 381             | 0.0447 |
|                             | T <sub>1</sub> → T <sub>28</sub> | 3.8980      | 318             | 0.1059 |
| [Pt(L <sup>3</sup> )(acac)] | T <sub>1</sub> → T <sub>10</sub> | 1.7918      | 692             | 0.0980 |
|                             | T <sub>1</sub> → T <sub>14</sub> | 2.2788      | 544             | 0.0541 |
|                             | T <sub>1</sub> → T <sub>15</sub> | 2.7107      | 457             | 0.1470 |
|                             | T <sub>1</sub> → T <sub>16</sub> | 2.9062      | 427             | 0.0551 |
|                             | T <sub>1</sub> → T <sub>22</sub> | 3.5124      | 353             | 0.0719 |
|                             | T <sub>1</sub> → T <sub>28</sub> | 3.9388      | 315             | 0.0853 |
| [Pt(L <sup>4</sup> )(acac)] | T <sub>1</sub> → T <sub>10</sub> | 1.7866      | 694             | 0.0480 |
|                             | T <sub>1</sub> → T <sub>14</sub> | 2.2543      | 550             | 0.0712 |
|                             | T <sub>1</sub> → T <sub>15</sub> | 2.7276      | 455             | 0.1085 |
|                             | T <sub>1</sub> → T <sub>17</sub> | 2.8939      | 428             | 0.0424 |
|                             | T <sub>1</sub> → T <sub>19</sub> | 3.2305      | 384             | 0.0645 |
|                             | T <sub>1</sub> → T <sub>28</sub> | 3.9076      | 317             | 0.0531 |
|                             | T <sub>1</sub> → T <sub>29</sub> | 3.9316      | 315             | 0.0549 |
| [Pt(L <sup>5</sup> )(acac)] | T <sub>1</sub> → T <sub>10</sub> | 1.7901      | 693             | 0.0454 |
|                             | T <sub>1</sub> → T <sub>13</sub> | 2.1210      | 585             | 0.0331 |
|                             | T <sub>1</sub> → T <sub>14</sub> | 2.3321      | 532             | 0.0588 |
|                             | T <sub>1</sub> → T <sub>15</sub> | 2.7726      | 447             | 0.1722 |
|                             | T <sub>1</sub> → T <sub>20</sub> | 3.3428      | 371             | 0.0300 |
|                             | T <sub>1</sub> → T <sub>27</sub> | 3.8495      | 322             | 0.1355 |

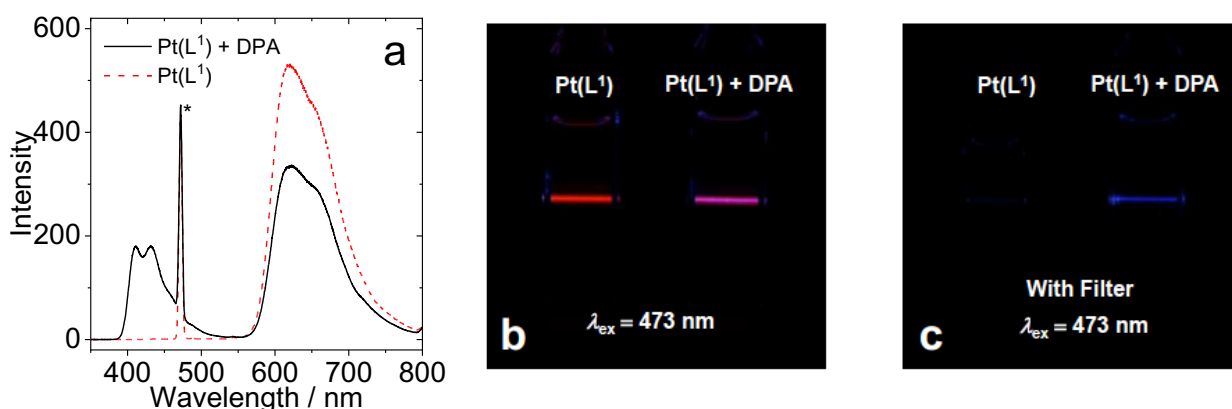

**Figure S38.** (a) TTA upconversion emission spectra with  $[\text{Pt}(\text{L}^1)(\text{acac})]$  as the photosensitizer and DPA as the acceptor in deaerated DCM. The asterisks indicate the scattered laser. (b) Photographs of  $[\text{Pt}(\text{L}^1)(\text{acac})]$  alone and the upconversion. (c) Photographs of upconversion solutions observed with band-pass filter (transparent in the range 380–520 nm). Excited with a 473 nm cw-laser with a power density of  $80 \text{ mW cm}^{-2}$ .  $c_{[\text{PSs}]}$  =  $1.0 \times 10^{-5} \text{ M}$ ,  $c_{[\text{DPA}]}$  =  $3.0 \times 10^{-5} \text{ M}$ ,  $25 \text{ }^\circ\text{C}$ .

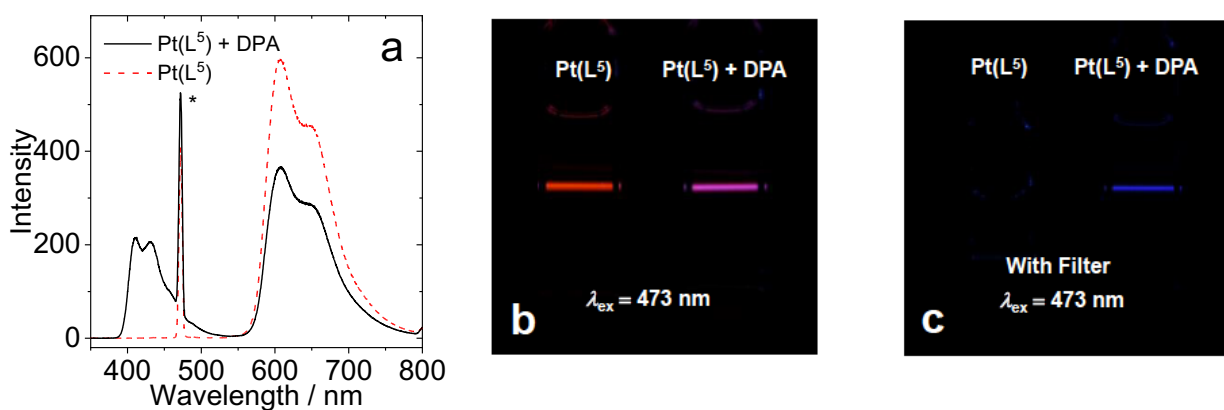

**Figure S39.** (a) TTA upconversion emission spectra with  $[\text{Pt}(\text{L}^5)(\text{acac})]$  as the photosensitizer and DPA as the acceptor in deaerated DCM. The asterisks indicate the scattered laser. (b) Photographs of  $[\text{Pt}(\text{L}^5)(\text{acac})]$  alone and the upconversion. (c) Photographs of upconversion solutions observed with band-pass filter (transparent in the range 380–520 nm). Excited with a 473 nm cw-laser with a power density of  $80 \text{ mW cm}^{-2}$ .  $c_{[\text{PSs}]}$  =  $1.0 \times 10^{-5} \text{ M}$ ,  $c_{[\text{DPA}]}$  =  $3.0 \times 10^{-5} \text{ M}$ ,  $25 \text{ }^\circ\text{C}$ .
